# Supplementary material for: The Paracrine Effect of Transplanted Human Amniotic Epithelial Cells on Ovarian Function Improvement in a Mouse Model of Chemotherapy‐Induced Primary Ovarian Insufficiency
Source: Hindawi journal article supplement (doi:10.1155/2016/4148923), 2015-11-09

Supplemental Figure 1: Immunohistochemical analysis for VEGFR1 expression in mice ovaries of different groups one month after treatment; Ovarian sections with no primary antibody were served as negative controls. (A): control group; (B): Bu/Cy administrated group; (C): Bu/Cy+hAECs(24h) group; (D): Bu/Cy+hAECs-CM(24h) group; (E): Bu/Cy+hAECs(7d) group; (F): Bu/Cy+hAECs-CM(7d) group; (G): negative control. Scale bar: 100  $\mu$ m.

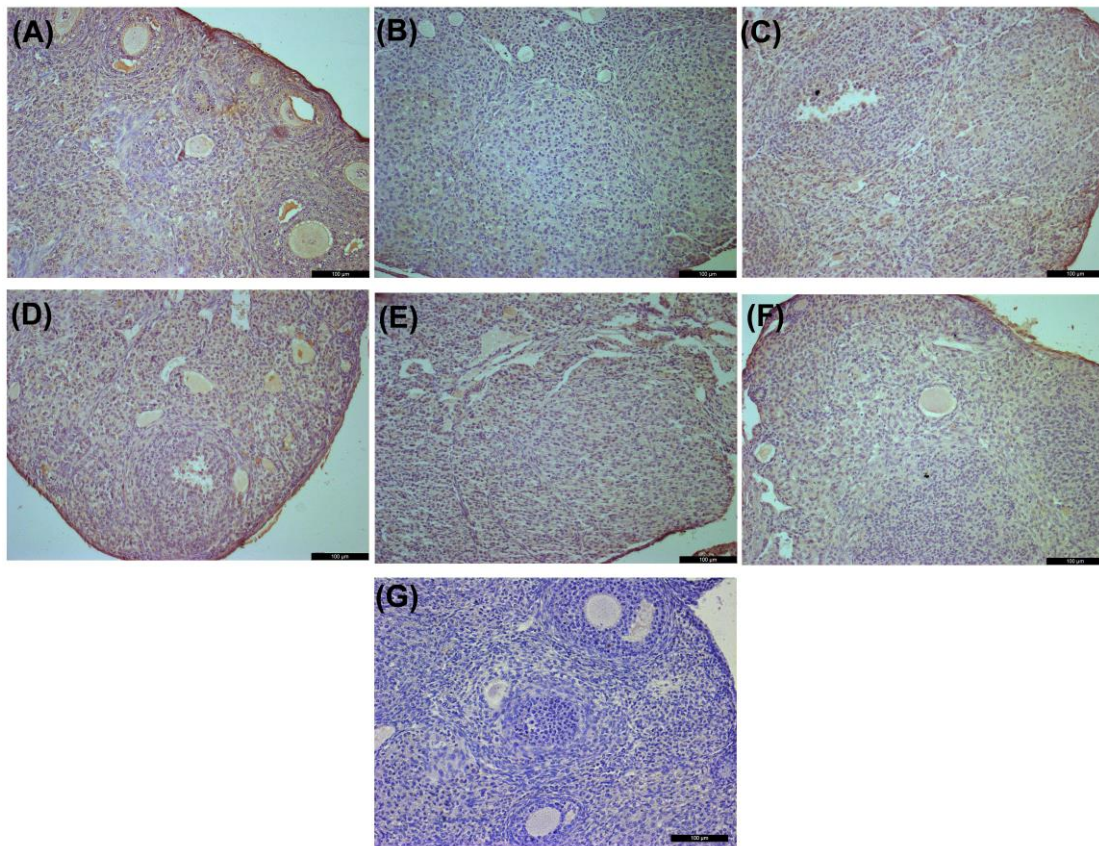

Supplemental Figure2: Immunohistochemical analysis for VEGFR2 expression in mice ovaries of different groups one month after treatment; Ovarian sections with no primary antibody were served as negative controls. (A): control group; (B): Bu/Cy-treated group; (C): Bu/Cy+hAECs(24h) group; (D): Bu/Cy+hAECs-CM(24h) group; (E): Bu/Cy+hAECs(7d) group; (F): Bu/Cy+hAECs-CM(7d) group; (G): negative control. Scale bar: 100  $\mu$ m.

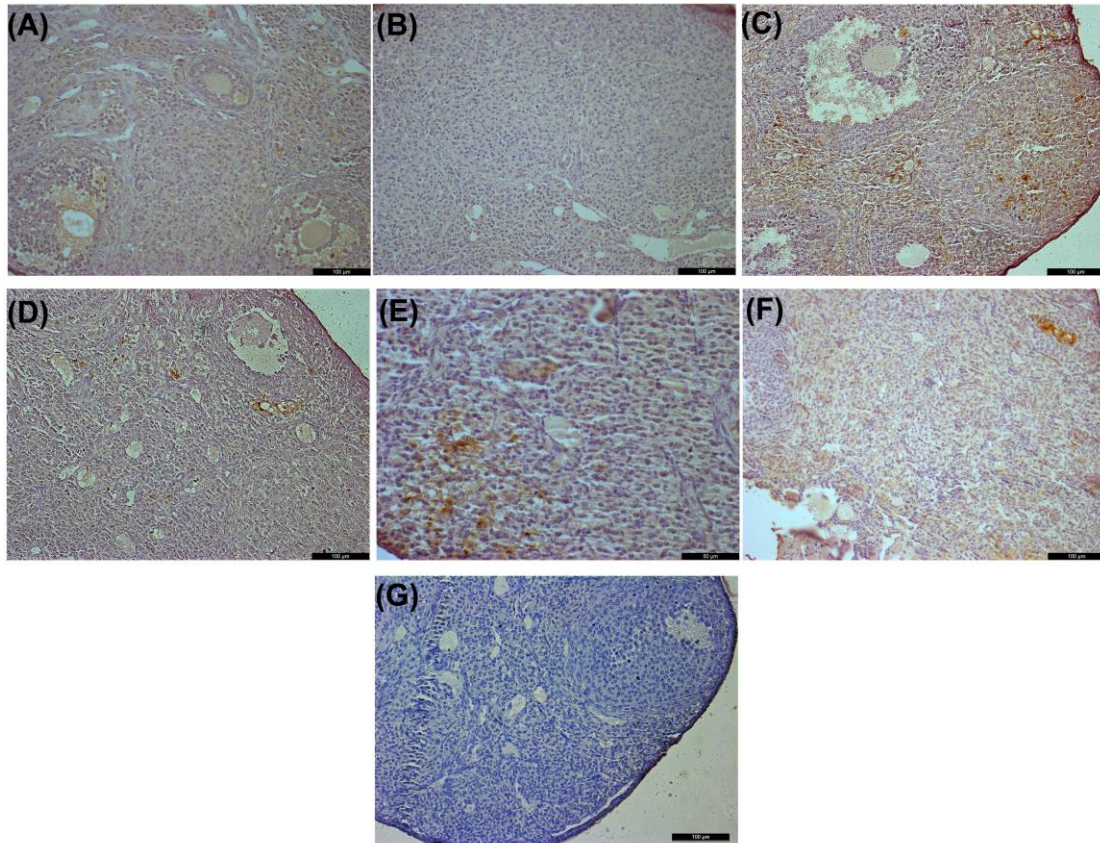

Supplemental Figure 3: Immunohistochemical analysis for VEGFA expression in mice ovaries of different groups one month after treatment; Ovarian sections with no primary antibody were served as negative controls. (A): control group; (B): Bu/Cy-treated group; (C): Bu/Cy+hAECs(24h) group; (D): Bu/Cy+hAECs-CM(24h) group; (E): Bu/Cy+hAECs(7d) group; (F): Bu/Cy+hAECs-CM(7d) group; (G): negative control. Scale bar: 100  $\mu$ m.

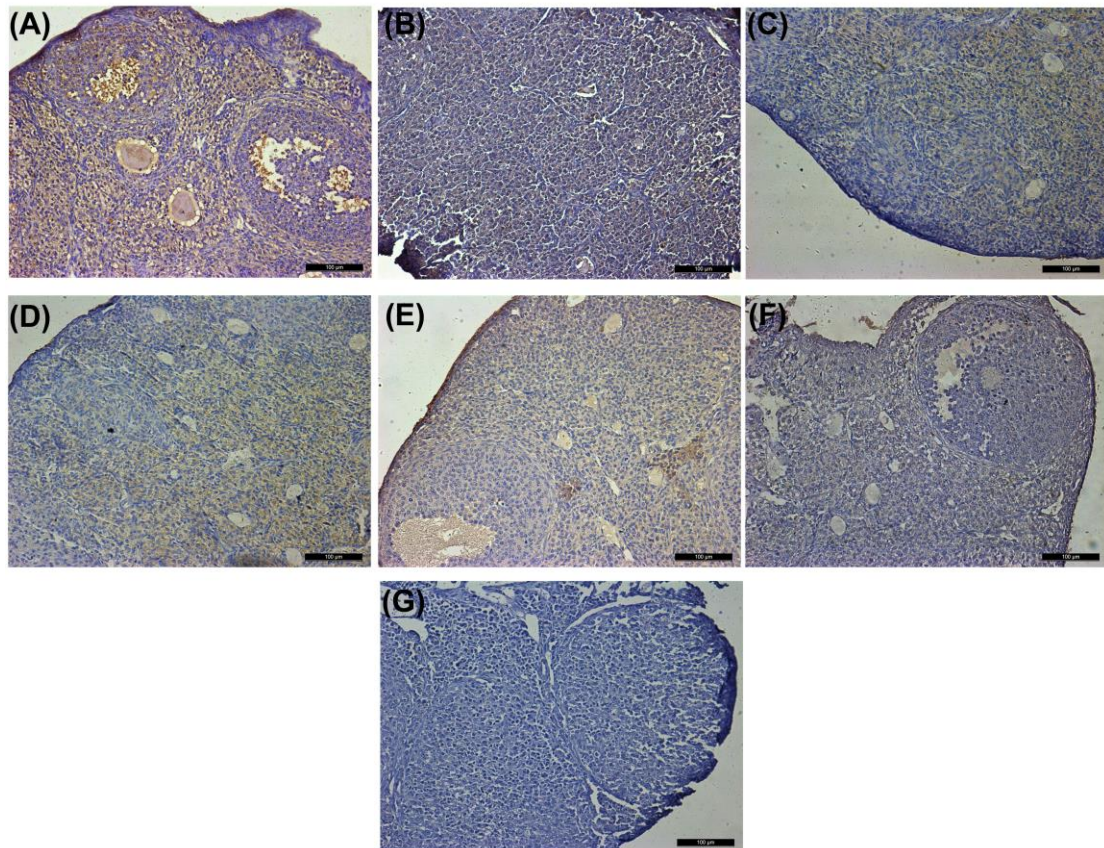

Supplement: f1 [file 4148923.f1.pdf]
